# Supplementary figures and images for: Therapeutic transdifferentiation of human fibroblasts into endothelial cells using forced expression of lineage-specific transcription factors
Source: PubMed Central journal article supplement — J Tissue Eng. 2016 Feb 1;7:2041731416628329. doi: 10.1177/2041731416628329 (PMC4820020; doi:10.1177/2041731416628329), 2016-02-01

# Supplemental Figure 1

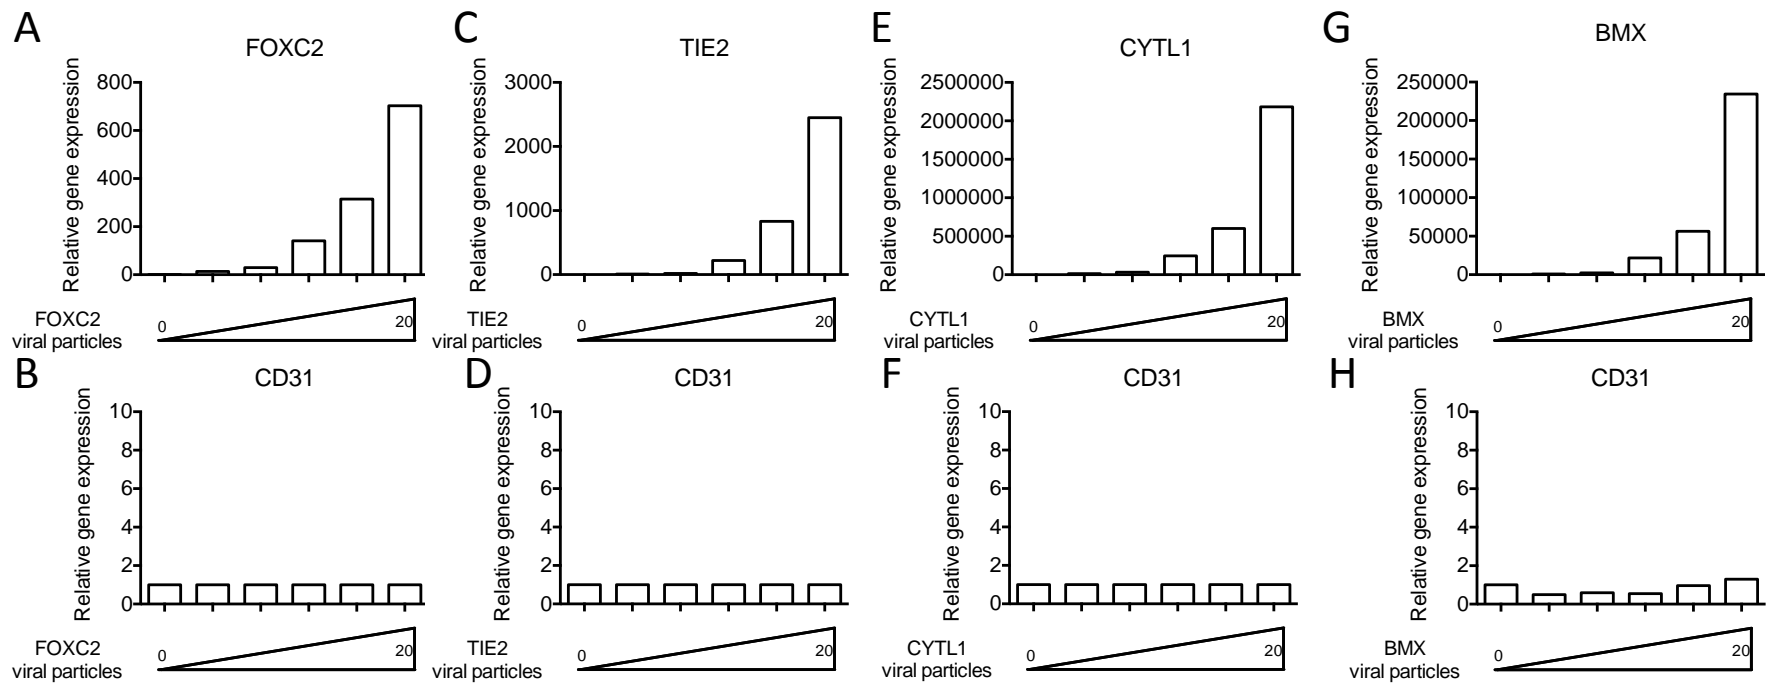

# Supplemental Figure 2

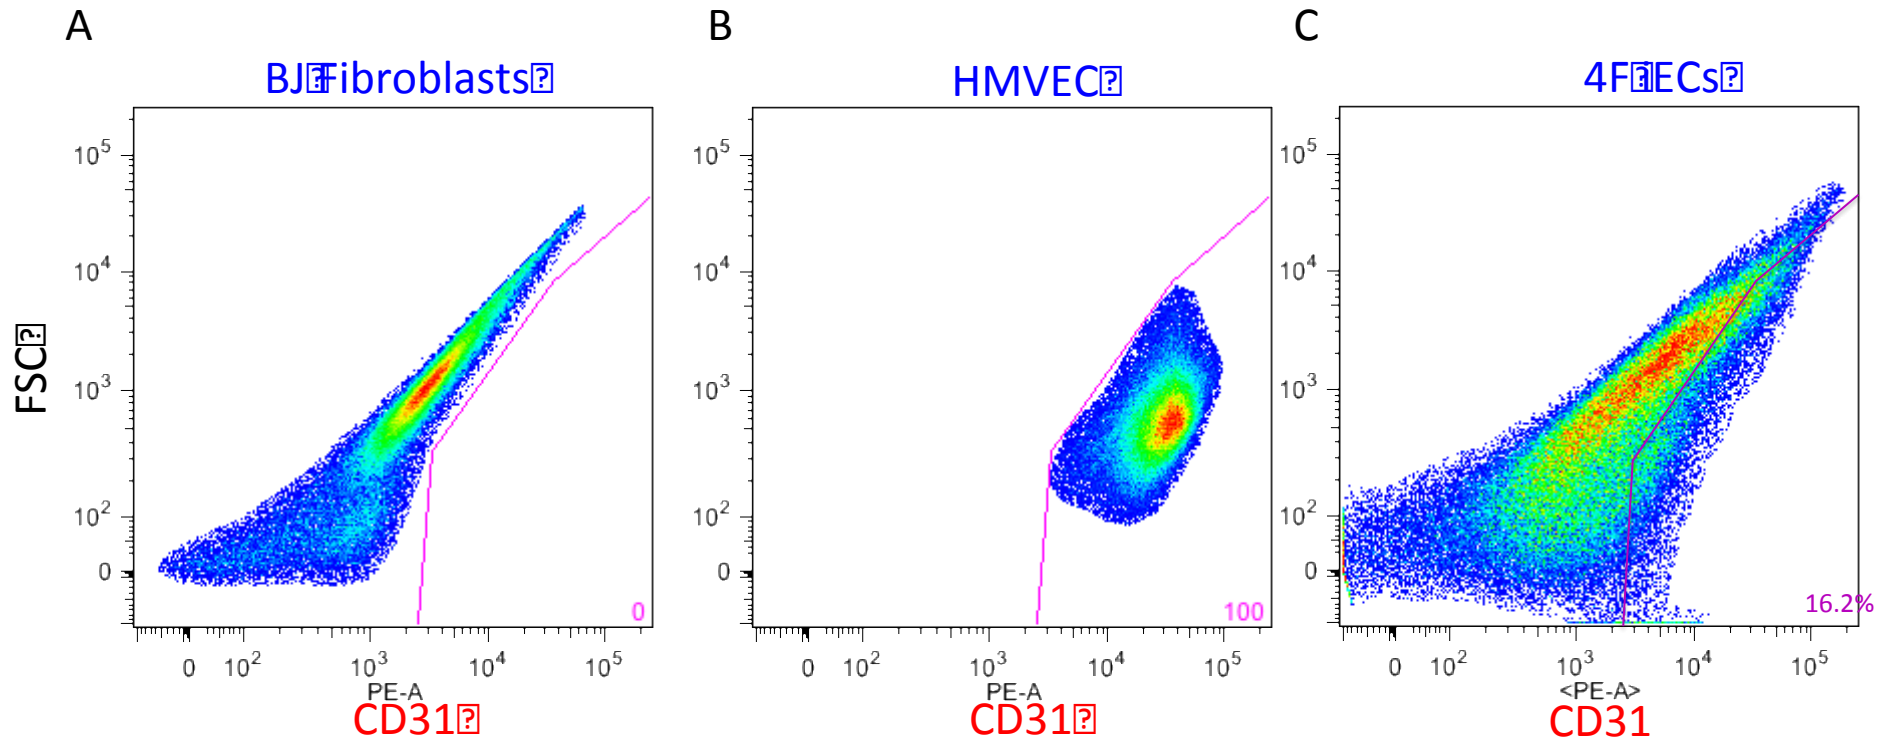

Supplement: cookewongFigForTransdifferentiation.pdf [file cookewongFigForTransdifferentiation.pdf]
